# Supplementary material for: Role of EmaSR in Ethanol Metabolism by Acinetobacter baumannii
Source: MDPI journal article supplement (doi:10.3390/ijms232012606), 2022-10-20
Supplement: s1 [file s1]

# Role of EmaSR in Ethanol Metabolism by *Acinetobacter baumannii*

## Supplementary Materials

Fig. S1A

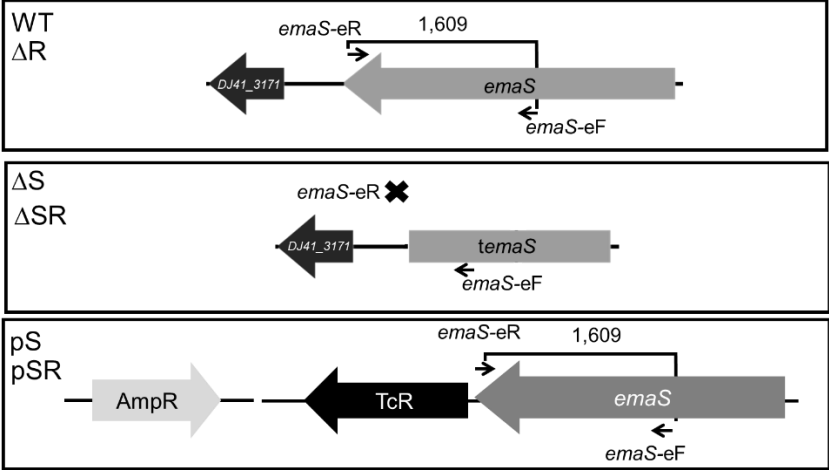

Fig. S1B

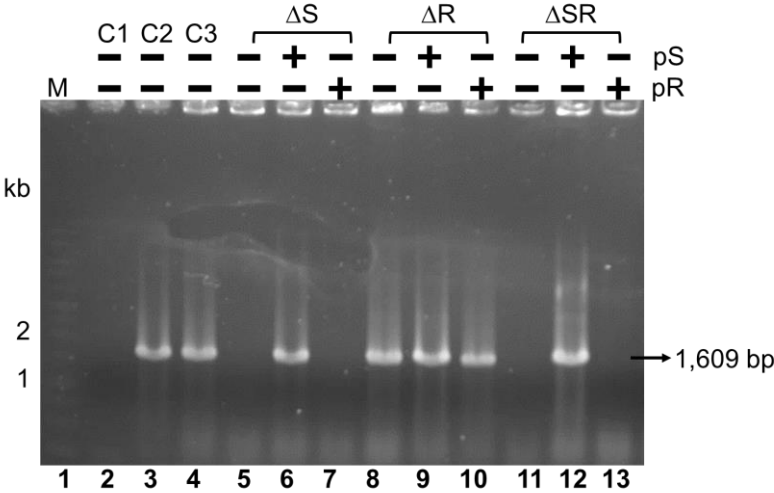

**Figure S1.** *EmaS* gene analysis of mutants and complementary strains. (A) Diagram of gene localization and primers for mutant and complementary strains. WT represents the wild-type strain.  $\Delta R$ ,  $\Delta S$ , and  $\Delta SR$  respectively represent the *emaR*, *emaS*, and *emaSR* mutants, while the pS and pSR strains respectively contain the complementation plasmids for *emaS* and *emaSR*. (B) PCR products analyzed by electrophoresis on a 0.8% agarose gel. The *emaS* gene was amplified by the *emaS*-eR and *emaS*-eF primers, with PCR fragment size of 1,069 bp. *EmaS* mutant strains have no PCR product. C1 is a negative control that used ddH<sub>2</sub>O as a template, while C2 used the wild-type chromosomal DNA as a template, and C3 used pS in *E. coli* DH5 $\alpha$  as a template. M represents the DNA size marker.

**Fig. S2A**

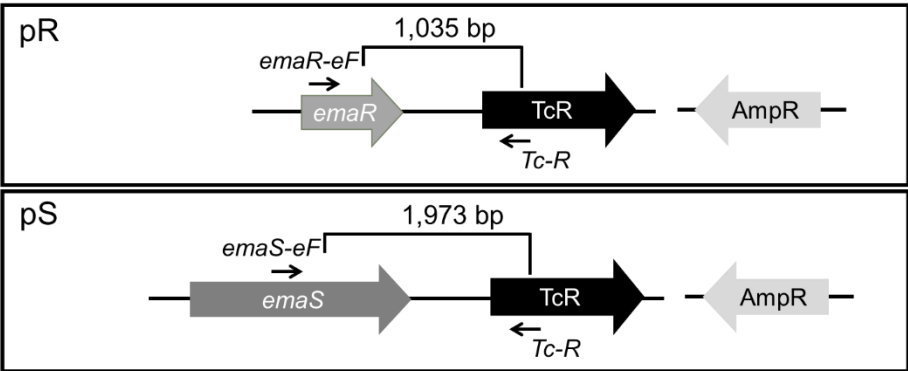

**Fig. S2B**

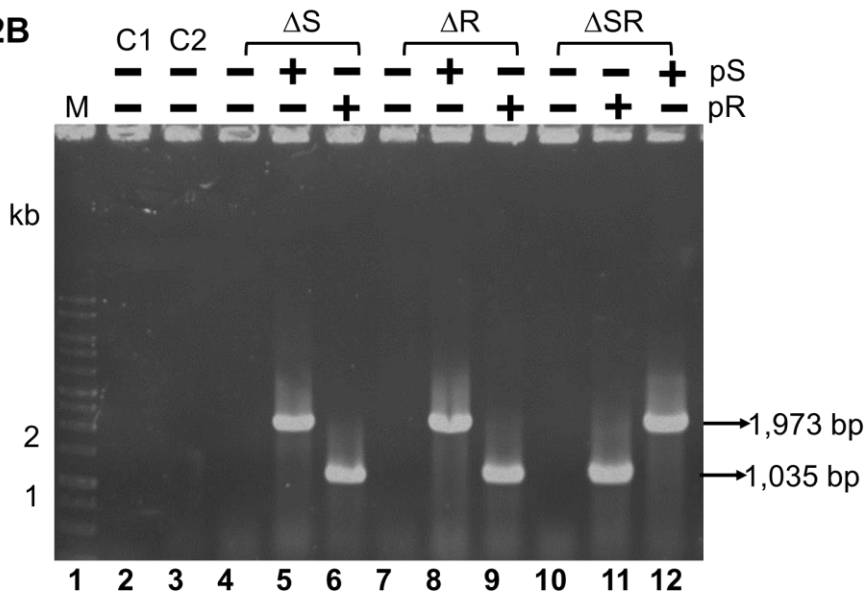

**Figure S2.** Complementary strains as confirmed by PCR. (A) Diagram of gene localization and primers for pR and pS, with pR confirmed using *emaR-eF* and *Tc-R* as primers, with expected amplification product of 1,035 bp, and pS confirmed using *emaS-eF* and *Tc-R* to amplify a DNA fragment of 1,973 bp in size. (B) PCR products analyzed by electrophoresis on a 0.8% agarose gel. C1 is a negative control that used ddH<sub>2</sub>O as a template, while C2 used the wild-type strain without complementary plasmid as a template.

**Table S1.** Differentially regulated genes in the *ΔemaSR* mutant strain versus the ATCC 19606 wild-type strain in key functional groups.

| Category and locus tag                                         | Gene        | Log <sub>2</sub> fold change <sup>a</sup> | p-value               | Predicted function                                                        |
|----------------------------------------------------------------|-------------|-------------------------------------------|-----------------------|---------------------------------------------------------------------------|
| <b>Carbon metabolism</b>                                       |             |                                           |                       |                                                                           |
| DJ41_2796                                                      | -           | 6.21                                      | $3.53 \times 10^{-9}$ | succinate CoA transferase family protein                                  |
| DJ41_569                                                       | -           | 5.78                                      | $2.12 \times 10^{-8}$ | E3 binding domain protein                                                 |
| DJ41_568                                                       | <i>lpdA</i> | 4.01                                      | $1.82 \times 10^{-5}$ | dihydrolipoyl dehydrogenase                                               |
| DJ41_2528                                                      | -           | 3.33                                      | 0.00019               | isocitrate lyase                                                          |
| DJ41_1153                                                      | <i>pta</i>  | 2.34                                      | 0.00574               | phosphate acetyltransferase                                               |
| DJ41_1152                                                      | <i>ackA</i> | 2.23                                      | 0.00789               | acetate kinase                                                            |
| DJ41_3568                                                      | <i>gltA</i> | 1.66                                      | 0.03356               | citrate (Si)-synthase                                                     |
| DJ41_227                                                       | <i>fumC</i> | 1.61                                      | 0.03873               | fumarate hydratase, class II                                              |
| <b>Phenylalanine metabolism</b>                                |             |                                           |                       |                                                                           |
| DJ41_3060                                                      | <i>hppD</i> | 3.51                                      | 0.00012               | 4-hydroxyphenylpyruvate dioxygenase                                       |
| DJ41_2050                                                      | <i>paaJ</i> | 2.43                                      | 0.00461               | phenylacetate-CoA oxygenase, PaaJ subunit                                 |
| DJ41_2049                                                      | -           | 2.08                                      | 0.01162               | 2Fe-2S iron-sulfur cluster binding domain protein                         |
| DJ41_2052                                                      | -           | 1.96                                      | 0.02361               | phenylacetic acid degradation B family protein                            |
| DJ41_3262                                                      | -           | 1.94                                      | 0.01876               | pyridine nucleotide-disulfide oxidoreductase family protein               |
| DJ41_2053                                                      | <i>paaA</i> | 1.90                                      | 0.01821               | phenylacetic acid degradation protein paaA                                |
| DJ41_2051                                                      | <i>paaC</i> | 1.84                                      | 0.02349               | phenylacetic acid degradation protein paaC                                |
| DJ41_2054                                                      | <i>paaN</i> | 1.73                                      | 0.02970               | phenylacetic acid degradation protein paaN                                |
| DJ41_2048                                                      | -           | 1.61                                      | 0.04592               | enoyl-CoA hydratase/isomerase family protein                              |
| <b>Biosynthesis of cofactors</b>                               |             |                                           |                       |                                                                           |
| DJ41_568                                                       | <i>lpdA</i> | 4.01                                      | $1.82 \times 10^{-5}$ | dihydrolipoyl dehydrogenase                                               |
| DJ41_3060                                                      | <i>hppD</i> | 3.51                                      | 0.00012               | 4-hydroxyphenylpyruvate dioxygenase                                       |
| <b>Biosynthesis of siderophore group nonribosomal peptides</b> |             |                                           |                       |                                                                           |
| DJ41_1728                                                      | -           | 3.75                                      | $8.51 \times 10^{-5}$ | isochorismate synthase family protein                                     |
| DJ41_1721                                                      | <i>entB</i> | 2.59                                      | 0.00266               | isochorismatase                                                           |
| DJ41_512                                                       | -           | 2.55                                      | 0.005                 | short chain dehydrogenase family protein                                  |
| DJ41_1720                                                      | -           | 2.25                                      | 0.00716               | (2,3-dihydroxybenzoyl)adenylate synthase                                  |
| <b>Purine metabolism</b>                                       |             |                                           |                       |                                                                           |
| DJ41_2077                                                      | -           | -4.36                                     | $8.52 \times 10^{-5}$ | cytidine and deoxycytidylate deaminase zinc-binding region family protein |
| <b>Tyrosine metabolism</b>                                     |             |                                           |                       |                                                                           |
| DJ41_3063                                                      | <i>maiA</i> | 3.85                                      | $8.99 \times 10^{-5}$ | maleylacetoacetate isomerase                                              |
| DJ41_3064                                                      | <i>fahA</i> | 3.53                                      | 0.00013               | fumarylacetoacetase                                                       |
| DJ41_3060                                                      | <i>hppD</i> | 3.51                                      | 0.00012               | 4-hydroxyphenylpyruvate dioxygenase                                       |
| <b>Two-component system</b>                                    |             |                                           |                       |                                                                           |

|                          |             |       |         |                                                         |
|--------------------------|-------------|-------|---------|---------------------------------------------------------|
| DJ41_2555                | -           | 2.35  | 0.00479 | TonB-dependent siderophore receptor family protein      |
| <b>Sulfur metabolism</b> |             |       |         |                                                         |
| DJ41_1587                | -           | -2.11 | 0.03619 | sulfate ABC transporter, sulfate-binding family protein |
| DJ41_3169                | <i>msuE</i> | -2.31 | 0.02509 | FMN reductase                                           |

<sup>a</sup> Log<sub>2</sub> fold change = Log<sub>2</sub>(WT/ $\Delta$ *emaSR*)

**Table S2.** Differentially regulated genes in the  $\Delta emaR$  mutant strain versus the ATCC 19606 wild-type strain in key functional groups.

| Category and locus tag                                         | Gene        | Log <sub>2</sub> fold change <sup>a</sup> | p-value                | Predicted function                                                        |
|----------------------------------------------------------------|-------------|-------------------------------------------|------------------------|---------------------------------------------------------------------------|
| <b>Carbon metabolism</b>                                       |             |                                           |                        |                                                                           |
| DJ41_2796                                                      | -           | 7.03                                      | $2.93 \times 10^{-10}$ | succinate CoA transferase family protein                                  |
| DJ41_569                                                       | -           | 4.88                                      | $1.37 \times 10^{-6}$  | e3 binding domain protein                                                 |
| DJ41_568                                                       | <i>lpdA</i> | 4.64                                      | $3.77 \times 10^{-6}$  | dihydrolipoyl dehydrogenase                                               |
| DJ41_2528                                                      | -           | 2.82                                      | 0.00199                | isocitrate lyase                                                          |
| DJ41_1153                                                      | <i>pta</i>  | 2.75                                      | 0.00304                | phosphate acetyltransferase                                               |
| DJ41_1152                                                      | <i>ackA</i> | 2.68                                      | 0.00371                | acetate kinase                                                            |
| <b>Phenylalanine metabolism</b>                                |             |                                           |                        |                                                                           |
| DJ41_3262                                                      | -           | 1.97                                      | 0.0293                 | pyridine nucleotide-disulfide oxidoreductase family protein               |
| <b>Biosynthesis of cofactors</b>                               |             |                                           |                        |                                                                           |
| DJ41_3276                                                      | -           | 4.72                                      | 0.00084                | hypothetical protein                                                      |
| DJ41_568                                                       | <i>lpdA</i> | 4.64                                      | $3.77 \times 10^{-6}$  | dihydrolipoyl dehydrogenase                                               |
| DJ41_3509                                                      | <i>nqO2</i> | 3.86                                      | 0.01529                | ribosyldihydronicotinamide dehydrogenase (quinone)                        |
| <b>Biosynthesis of siderophore group nonribosomal peptides</b> |             |                                           |                        |                                                                           |
| DJ41_1728                                                      | -           | 2.17                                      | 0.01904                | isochorismate synthase family protein                                     |
| <b>Purine metabolism</b>                                       |             |                                           |                        |                                                                           |
| DJ41_3122                                                      | <i>uraD</i> | 3.95                                      | 0.03722                | OHCU decarboxylase                                                        |
| DJ41_3118                                                      | -           | 2.96                                      | 0.01487                | FAD binding domain protein                                                |
| DJ41_3123                                                      | -           | 2.66                                      | 0.04244                | polysaccharide deacetylase family protein                                 |
| DJ41_2077                                                      | -           | -3.83                                     | 0.00025                | cytidine and deoxycytidylate deaminase zinc-binding region family protein |
| <b>Two-component system</b>                                    |             |                                           |                        |                                                                           |
| DJ41_3249                                                      | -           | 16.78                                     | 0.00028                | autoinducer synthetase family protein                                     |
| DJ41_3468                                                      | -           | 2.29                                      | 0.01665                | cheW-like domain protein                                                  |
| DJ41_1407                                                      | -           | 2.17                                      | 0.04247                | PAS fold family protein                                                   |
| <b>Bacterial secretion system</b>                              |             |                                           |                        |                                                                           |
| DJ41_1170                                                      | <i>tatC</i> | 4.47                                      | 0.00751                | twin arginine-targeting protein translocase TatC                          |

<sup>a</sup> Log<sub>2</sub> fold change = Log<sub>2</sub>(WT/ $\Delta emaR$ )

**Table S3.** Differentially regulated genes in the *ΔemaS* mutant strain versus the ATCC 19606 wild-type strain in key functional groups.

| Category and locus tag                                         | Gene        | Log <sub>2</sub> fold change <sup>a</sup> | p-value                | Predicted function                                                        |
|----------------------------------------------------------------|-------------|-------------------------------------------|------------------------|---------------------------------------------------------------------------|
| <b>Carbon metabolism</b>                                       |             |                                           |                        |                                                                           |
| DJ41_2796                                                      | -           | 6.66                                      | $6.88 \times 10^{-10}$ | succinate CoA transferase family protein                                  |
| DJ41_2528                                                      | -           | 2.65                                      | 0.00208                | isocitrate lyase                                                          |
| DJ41_1152                                                      | <i>ackA</i> | 2.47                                      | 0.00443                | acetate kinase                                                            |
| DJ41_1153                                                      | <i>pta</i>  | 2.47                                      | 0.00433                | phosphate acetyltransferase                                               |
| DJ41_227                                                       | <i>fumC</i> | 1.73                                      | 0.03169                | fumarate hydratase, class II                                              |
| DJ41_1959                                                      | -           | -2.15                                     | 0.03472                | catalase family protein                                                   |
| DJ41_2119                                                      | -           | -2.67                                     | 0.00812                | D-ala D-ala ligase family protein                                         |
| DJ41_568                                                       | <i>lpdA</i> | -2.91                                     | 0.00352                | dihydrolipoyl dehydrogenase                                               |
| DJ41_569                                                       | -           | -3.05                                     | 0.00219                | e3 binding domain protein                                                 |
| <b>Phenylalanine metabolism</b>                                |             |                                           |                        |                                                                           |
| DJ41_3060                                                      | <i>hppD</i> | 3.21                                      | 0.00037                | 4-hydroxyphenylpyruvate dioxygenase                                       |
| DJ41_3262                                                      | -           | 2.51                                      | 0.00415                | pyridine nucleotide-disulfide oxidoreductase family protein               |
| DJ41_2051                                                      | <i>paaC</i> | 2.03                                      | 0.01538                | phenylacetic acid degradation protein paaC                                |
| DJ41_2054                                                      | <i>paaN</i> | 2.00                                      | 0.01565                | phenylacetic acid degradation protein paaN                                |
| DJ41_2050                                                      | <i>paaJ</i> | 1.97                                      | 0.01879                | phenylacetate-CoA oxygenase, PaaJ subunit                                 |
| DJ41_2052                                                      | -           | 1.73                                      | 0.04316                | phenylacetic acid degradation B family protein                            |
| DJ41_2053                                                      | <i>paaA</i> | 1.57                                      | 0.04764                | phenylacetic acid degradation protein paaA                                |
| <b>Biosynthesis of cofactors</b>                               |             |                                           |                        |                                                                           |
| DJ41_3509                                                      | <i>nqO2</i> | 3.28                                      | 0.02682                | ribosyldihydronicotinamide dehydrogenase quinone                          |
| DJ41_3060                                                      | <i>hppD</i> | 3.21                                      | 0.00037                | 4-hydroxyphenylpyruvate dioxygenase                                       |
| DJ41_3276                                                      | -           | 3.06                                      | 0.01392                | hypothetical protein                                                      |
| DJ41_572                                                       | <i>lipA</i> | -2.65                                     | 0.01033                | lipoyl synthase                                                           |
| DJ41_568                                                       | <i>lpdA</i> | -2.91                                     | 0.00352                | dihydrolipoyl dehydrogenase                                               |
| <b>Biosynthesis of siderophore group nonribosomal peptides</b> |             |                                           |                        |                                                                           |
| DJ41_1728                                                      | -           | 4.34                                      | $1.29 \times 10^{-5}$  | isochorismate synthase family protein                                     |
| DJ41_1721                                                      | <i>entB</i> | 3.80                                      | $5.65 \times 10^{-5}$  | isochorismatase                                                           |
| DJ41_1720                                                      | -           | 3.51                                      | 0.00014                | (2,3-dihydroxybenzoyl)adenylate synthase                                  |
| DJ41_512                                                       | -           | 3.44                                      | 0.00041                | short chain dehydrogenase family protein                                  |
| <b>Purine metabolism</b>                                       |             |                                           |                        |                                                                           |
| DJ41_3122                                                      | <i>uraD</i> | 3.52                                      | 0.04837                | OHCU decarboxylase                                                        |
| DJ41_3123                                                      | -           | 2.84                                      | 0.02402                | polysaccharide deacetylase family protein                                 |
| DJ41_2077                                                      | -           | -4.56                                     | $4.28 \times 10^{-5}$  | cytidine and deoxycytidylate deaminase zinc-binding region family protein |

| Tyrosine metabolism        |             |      |                      |                                                    |
|----------------------------|-------------|------|----------------------|----------------------------------------------------|
| DJ41_3063                  | <i>maiA</i> | 3.95 | $7.4 \times 10^{-5}$ | maleylacetoacetate isomerase                       |
| DJ41_3064                  | <i>fahA</i> | 3.58 | 0.00012              | fumarylacetoacetase                                |
| Two-component system       |             |      |                      |                                                    |
| DJ41_3249                  | -           | 3.85 | 0.03103              | autoinducer synthetase family protein              |
| DJ41_2555                  | -           | 3.54 | 0.00010              | TonB-dependent siderophore receptor family protein |
| DJ41_3060                  | <i>hppD</i> | 3.21 | 0.00037              | 4-hydroxyphenylpyruvate dioxygenase                |
| DJ41_3468                  | -           | 1.84 | 0.03365              | cheW-like domain protein                           |
| Bacterial secretion system |             |      |                      |                                                    |
| DJ41_1170                  | <i>tatC</i> | 4.13 | 0.00921              | twin arginine-targeting protein translocase TatC   |
| DJ41_1169                  | <i>tatB</i> | 3.81 | 0.04078              | twin arginine-targeting protein translocase TatB   |

**Table S4.** List of plasmids used in this study.

| Name             | Sequence (5'-3')                              | Function                           |
|------------------|-----------------------------------------------|------------------------------------|
| <i>emaSupF</i>   | ACATGACCCAAGGGGTAAGCTAATCATTTATCGCTTCCC       | Construction of <i>emaS</i> mutant |
| pK18_emaSupR     | GAGCTCGGTACCCGGGAATCAACAAAGAGAGCTGCG          | Construction of <i>emaS</i> mutant |
| pK18_emaSdownF   | ACGACGGCCAGTGCCATGCATCAACAGGTATGTTAC          | Construction of <i>emaS</i> mutant |
| <i>emaSdownR</i> | TGGGAAGCGATAAATGATTAGCTTACCCCTTGGGTCATGT      | Construction of <i>emaS</i> mutant |
| <i>emaRupF</i>   | TTCATGAAACAGCTTCGGTTATGTTCCACTTAGGCAAGGC      | Construction of <i>emaR</i> mutant |
| pK18_emaRupR     | GAGCTCGGTACCCGGGTCACCTTATACGACTTTAGT          | Construction of <i>emaR</i> mutant |
| pK18_emaRdownF   | ACGACGGCCAGTGCCATAACTGTTCACTTTTCACCG          | Construction of <i>emaR</i> mutant |
| <i>emaRdownR</i> | GCCTTGCCTAAGTGGAACATAACCGAAGCTGTTTCATGAA      | Construction of <i>emaR</i> mutant |
| <i>emaS-eF</i>   | <i>Bam</i> HI GGATCCGCTTTAGGACAAGTGGCTAA      | Expression of <i>emaS</i>          |
| <i>emaS-eR</i>   | <i>Hind</i> III AAGCTTTTAGTCTGTCTGCTGGCAA     | Expression of <i>emaS</i>          |
| <i>emaR-eF</i>   | <i>Bam</i> HI TTGGATCCATGGAAAATGGGGCAGAACCTGA | Expression of <i>emaR</i>          |
| <i>emaR-eR</i>   | <i>Sma</i> I TTCCCGGGTTAGATTTTTTTTATCTTCAA    | Expression of <i>emaR</i>          |
| pWH-emaScF       | GACAGCTTATCATCGATAAACCAAACCTTACATAGTG         | Complement of <i>emaS</i>          |
| pWH-emaScR       | GATAAACTACCCCATTAATTAGTCTGTCTGCTGGCAA         | Complement of <i>emaS</i>          |
| pWH-emaRcF       | CCCTTTCGTCTTCAAGGATTTGGTTCCTAAGCCTAA          | Complement of <i>emaR</i>          |
| pWH-emaRcR       | AGCTGTCAAACATGAGTTAGATTTTTTTTATCTTCAA         | Complement of <i>emaR</i>          |
| DJ41_571-rF      | TGCAATTAACGGAAGAGCAA                          | RT-PCR                             |
| DJ41_571-rR      | TGTCCACGGTGTGTGAAGT                           | RT-PCR                             |
| DJ41_2796-rF     | TGGAATGACCGTTGGTATGA                          | RT-PCR                             |
| DJ41_2796-rR     | TAAACATGACTTCGCCGTTG                          | RT-PCR                             |
| DJ41_3170-rF     | AATCGTTGATGATCATCCTT                          | RT-PCR                             |
| DJ41_3170-rR     | TCTTCGTGTGCAGAAACCAC                          | RT-PCR                             |
| DJ41_3172-rF     | CCTCACCCCTCAACCCAAATA                         | RT-PCR                             |
| DJ41_3172-rR     | CTTACCCCTTGGGTCATGTG                          | RT-PCR                             |
| DJ41_3174-rF     | TATTACCAAATGGGCGGCTA                          | RT-PCR                             |
| DJ41_3174-rR     | CCCGAGTGAATAGAGCAAGC                          | RT-PCR                             |
| DJ41_3688-rF     | GGCGGTTTATCTGAGTTTGT                          | RT-PCR                             |
| DJ41_3688-rR     | TTTGTGGAATGTTGTTTGTG                          | RT-PCR                             |
| DJ41_3771-rF     | AAGGGCAACTCTCGTCTCAA                          | RT-PCR                             |
| DJ41_3771-rR     | CAGGCGCAAATACATCAAAA                          | RT-PCR                             |
| DJ41_571-rF      | TGCAATTAACGGAAGAGCAA                          | RT-PCR                             |

\* Start codon (Met) as 0.
